# Supplementary material for: Comparison of Glucose Lowering Effect of Metformin and Acarbose in Type 2 Diabetes Mellitus: A Meta-Analysis
Source: PubMed Central journal article supplement (PMC4427275; doi:10.1371/journal.pone.0126704), 2015-05-11
Supplement: pone.0126704.s004.pdf [file pone.0126704.s004.pdf]

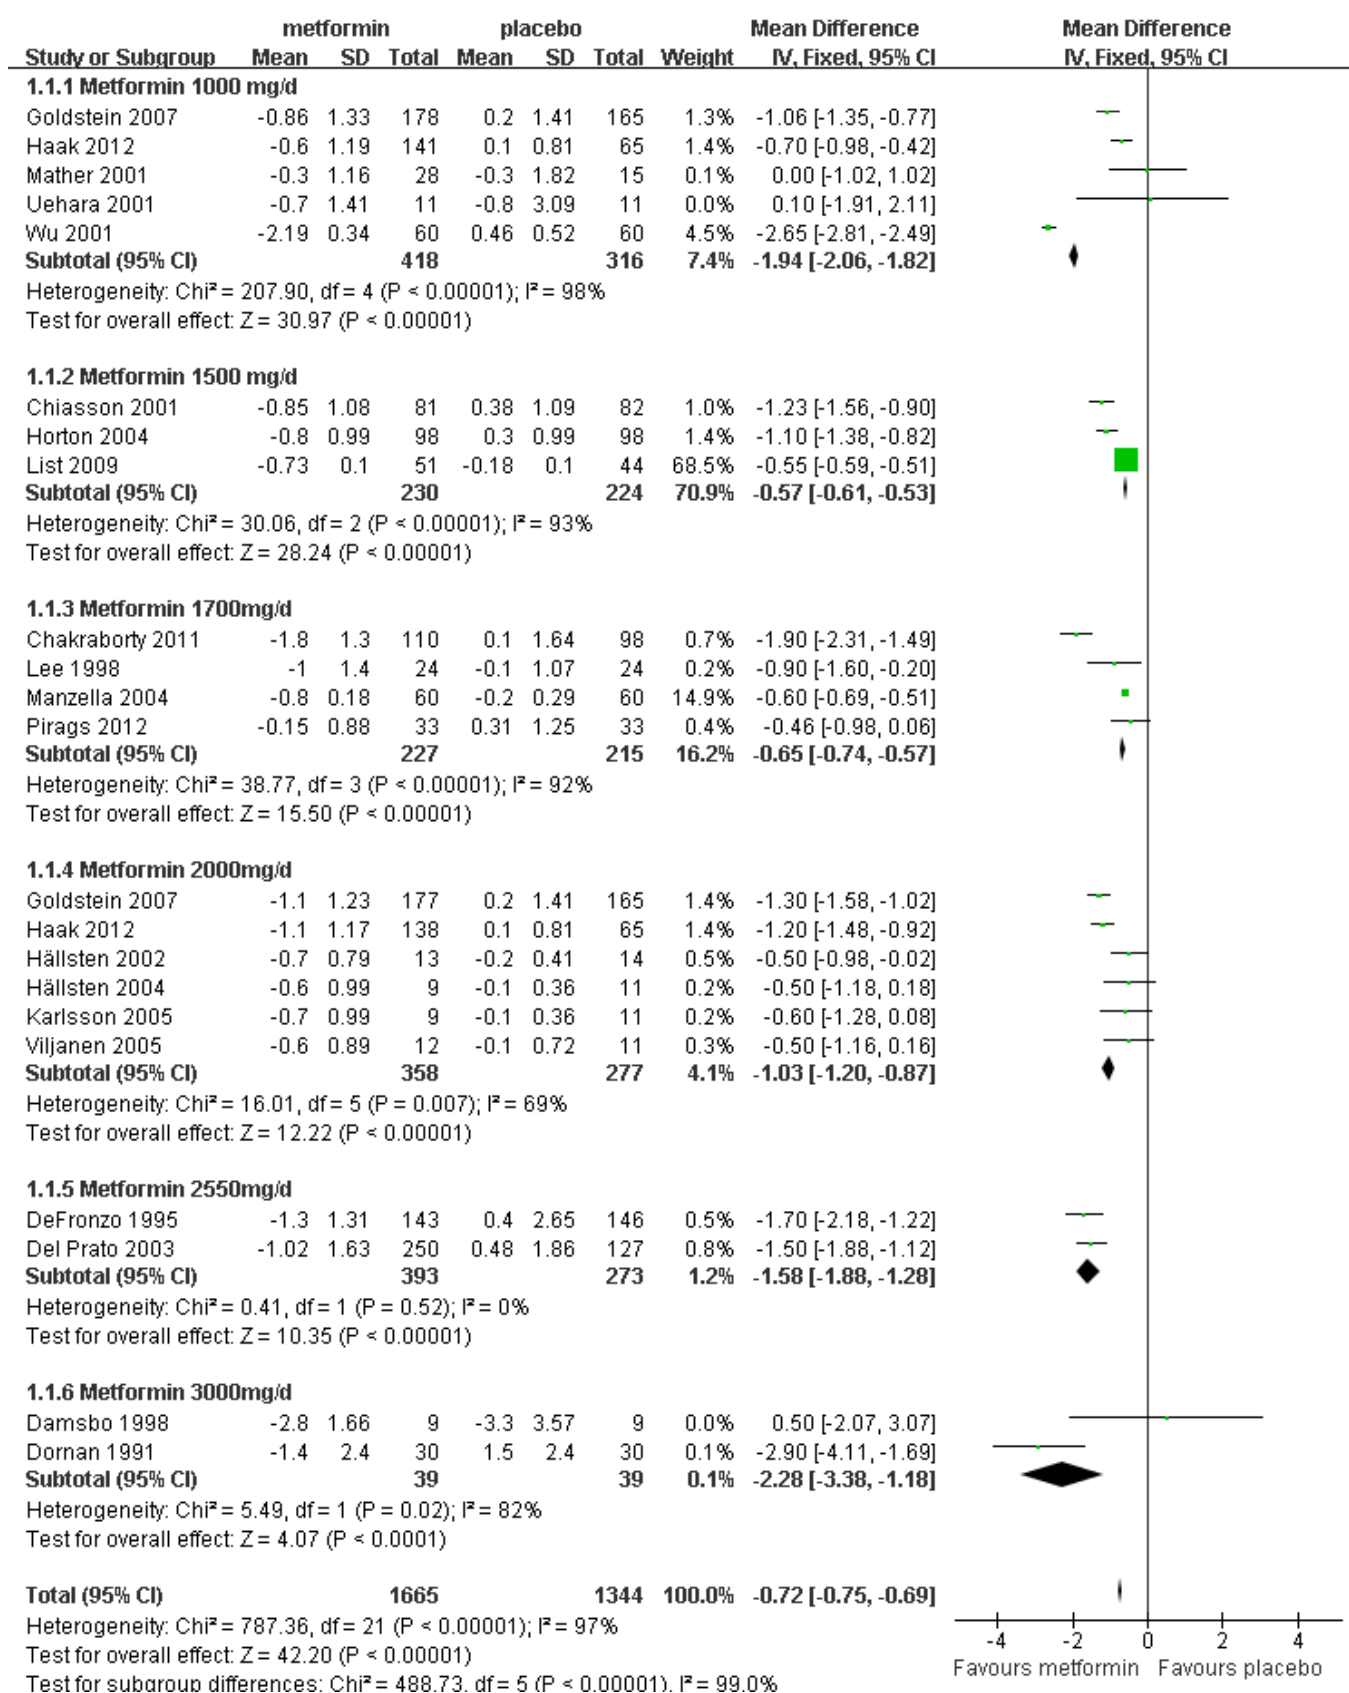

**S3 Fig. Sensitivity analysis: Glucose lowering effect (reduction of HbA<sub>1c</sub>) of metformin versus placebo (use a fixed-effect model instead)**
