# Supplementary material for: Comparison of Glucose Lowering Effect of Metformin and Acarbose in Type 2 Diabetes Mellitus: A Meta-Analysis
Source: PubMed Central journal article supplement (PMC4427275; doi:10.1371/journal.pone.0126704), 2015-05-11
Supplement: pone.0126704.s011.pdf [file pone.0126704.s011.pdf]

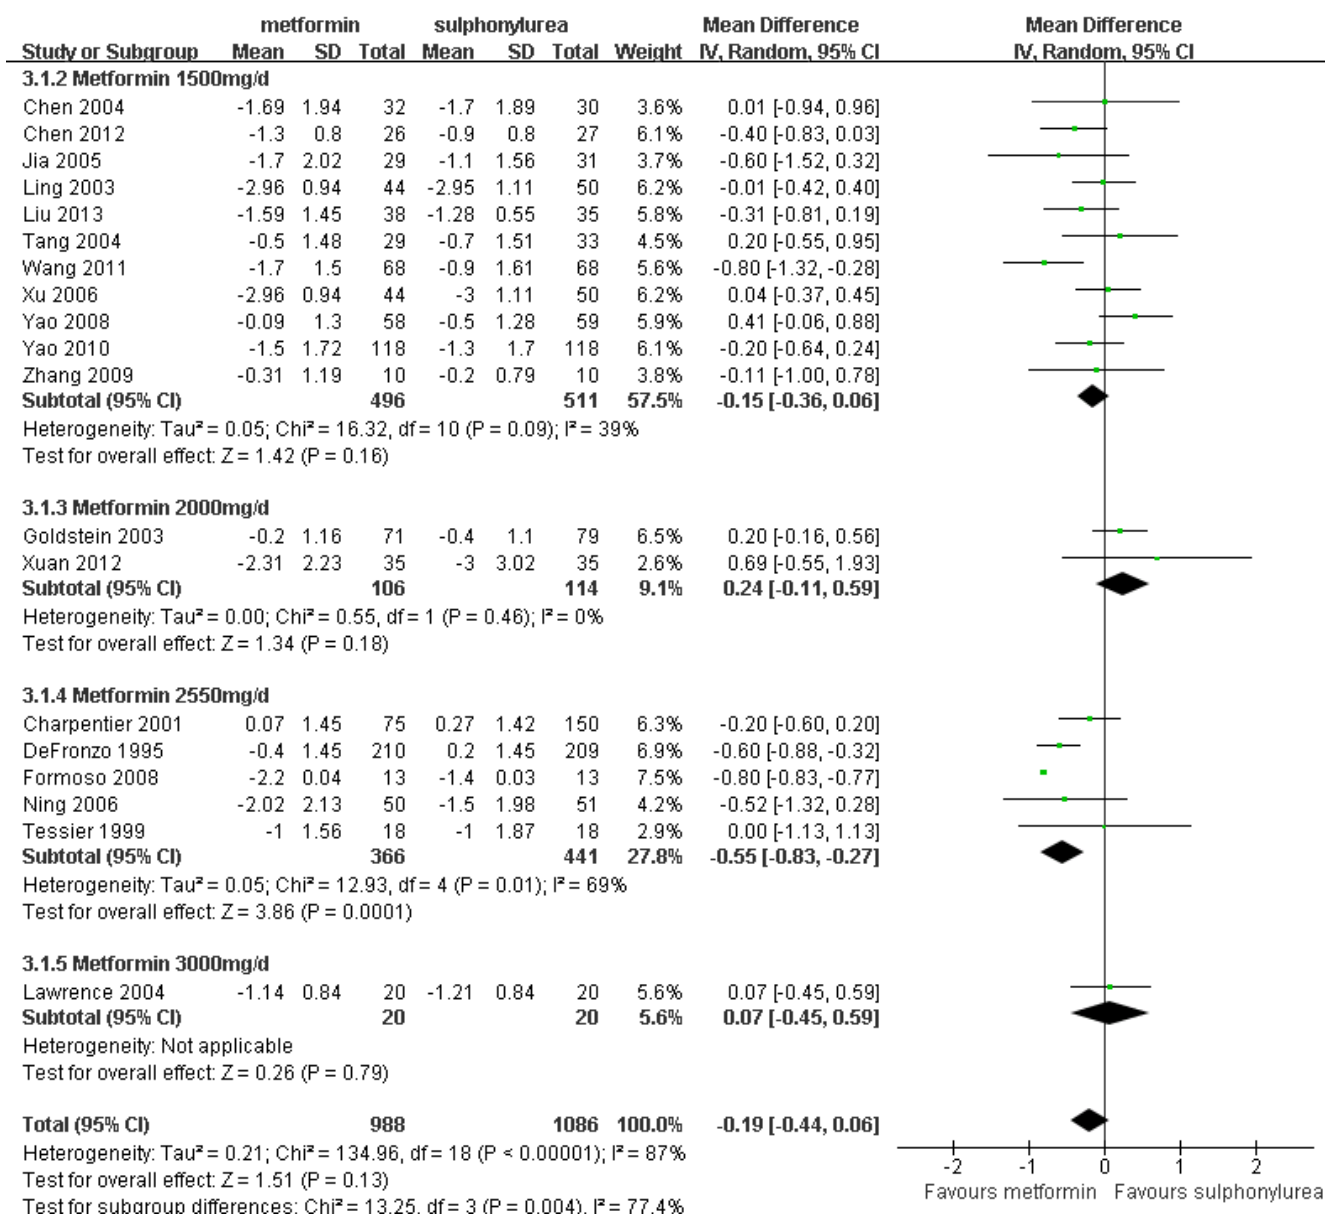

**S10 Fig. Sensitivity analysis: Glucose lowering effect (reduction of HbA<sub>1c</sub>) of metformin versus sulphonylureas (adjust drug doses, set  $\geq 1500\text{mg/d}$  as maximum or maintenance dose of metformin)**
