# Supplementary material for: Comparison of Glucose Lowering Effect of Metformin and Acarbose in Type 2 Diabetes Mellitus: A Meta-Analysis
Source: PLOS journal article supplement (doi:10.1371/journal.pone.0126704), 2015-05-11
Supplement: S14 (10.1371/journal.pone.0126704.s014) [file journal.pone.0126704.s014]

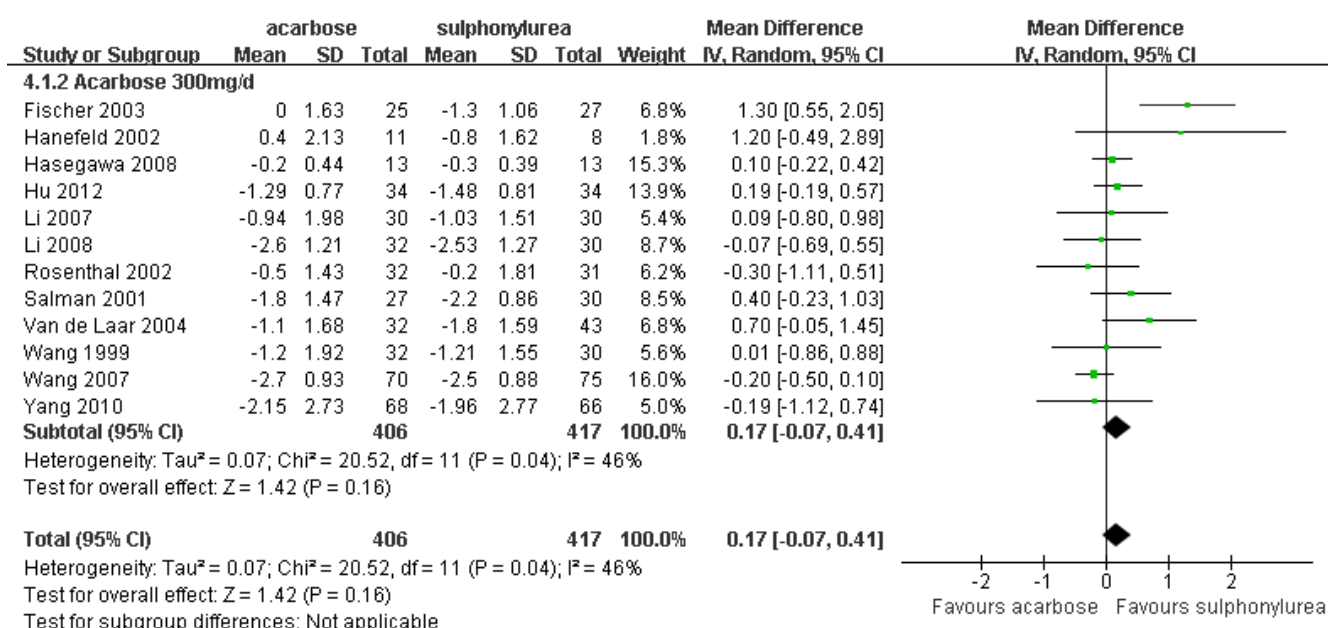

**S13 Fig. Sensitivity analysis: Glucose lowering effect (reduction of HbA<sub>1c</sub>) of acarbose versus sulphonylureas (adjust drug doses, set  $\geq 300$  mg/d as maximum or maintenance dose of acarbose)**
